# Supplementary material
Source: PubMed Central journal article supplement (PMC2848103)

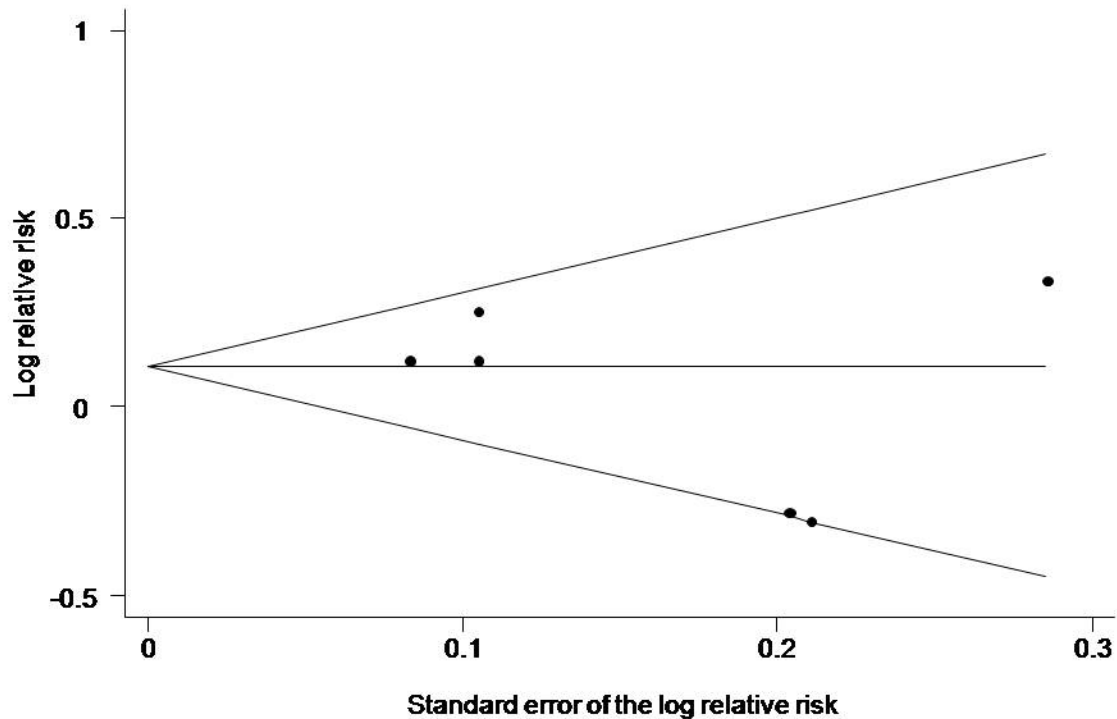

Supplement: supp_74_12_995__2.pdf [file supp_74_12_995__2.pdf]
